# Supplementary material for: Analytic three-dimensional ‘MLR’ potential energy surface for CO2–He, and its predicted microwave and infrared spectra
Source: Royal Society of Chemistry journal article supplement (doi:10.1039/b800718g), 2008-01-01
Supplement: b800718g.pdf [file b800718g.pdf]

**Supplementary Tables for**  
**Analytic Three-Dimensional ‘MLR’ Potential Energy Surface for**  
**CO<sub>2</sub>-He, and Its Predicted Microwave and Infrared Spectra**

Hui Li and Robert J. Le Roy,\*

*Department of Chemistry, University of Waterloo, Waterloo, Ontario N2L 3G1, Canada*

(Dated: May 16, 2008)

---

\* E-mail address [leroy@uwaterloo.ca](mailto:leroy@uwaterloo.ca)

**Table A-1.** Comparison of pure rotation level spacings of  $\text{CO}_2(v_3 = 0)$ -He calculated from our vibrationally averaged 2D PES, with experimental values defined as differences between observed infrared transitions<sup>a</sup> with a common upper state.

| levels<br>$J'_{K'_a K'_c} - J''_{K''_a K''_c}$ | obs.   | original 2D PES |         | $R_e$ -morphed PES |         |
|------------------------------------------------|--------|-----------------|---------|--------------------|---------|
|                                                |        | calc.           | diff.   | calc.              | diff.   |
| 1 <sub>01</sub> - 0 <sub>00</sub>              | 0.5916 | 0.5881          | -0.0035 | 0.5915             | -0.0001 |
| 2 <sub>02</sub> - 0 <sub>00</sub>              | 1.5836 | 1.5782          | -0.0054 | 1.5841             | 0.0005  |
| 2 <sub>20</sub> - 0 <sub>00</sub>              | 2.4497 | 2.4425          | -0.0072 | 2.4506             | 0.0009  |
| 2 <sub>21</sub> - 1 <sub>01</sub>              | 1.6748 | 1.6755          | 0.0007  | 1.6760             | 0.0012  |
| 3 <sub>03</sub> - 1 <sub>01</sub>              | 2.3392 | 2.3323          | -0.0069 | 2.3388             | -0.0004 |
| 2 <sub>20</sub> - 2 <sub>02</sub>              | 0.8661 | 0.8644          | -0.0017 | 0.8665             | 0.0004  |
| 3 <sub>22</sub> - 2 <sub>02</sub>              | 2.3997 | 2.3922          | -0.0075 | 2.3995             | -0.0002 |
| 4 <sub>04</sub> - 2 <sub>02</sub>              | 3.0667 | 3.0547          | -0.0120 | 3.0642             | -0.0025 |
| 3 <sub>22</sub> - 2 <sub>20</sub>              | 1.5345 | 1.5279          | -0.0066 | 1.5330             | -0.0015 |
| 3 <sub>03</sub> - 2 <sub>21</sub>              | 0.6653 | 0.6568          | -0.0085 | 0.6628             | -0.0025 |
| 3 <sub>21</sub> - 2 <sub>21</sub>              | 2.3020 | 2.2795          | -0.0225 | 2.2983             | -0.0037 |
| 4 <sub>41</sub> - 2 <sub>21</sub>              | 5.6243 | 5.6166          | -0.0077 | 5.6230             | -0.0013 |
| 3 <sub>21</sub> - 3 <sub>03</sub>              | 1.6367 | 1.6226          | -0.0141 | 1.6356             | -0.0011 |
| 4 <sub>23</sub> - 3 <sub>03</sub>              | 3.2037 | 3.1901          | -0.0136 | 3.2022             | -0.0015 |
| 5 <sub>05</sub> - 3 <sub>03</sub>              | 3.8131 | 3.7965          | -0.0166 | 3.8088             | -0.0043 |
| 4 <sub>23</sub> - 3 <sub>21</sub>              | 1.5665 | 1.5674          | 0.0009  | 1.5666             | 0.0001  |
| 4 <sub>41</sub> - 3 <sub>21</sub>              | 3.3223 | 3.3371          | 0.0148  | 3.3246             | 0.0023  |
| 4 <sub>04</sub> - 3 <sub>22</sub>              | 0.6664 | 0.6624          | -0.0040 | 0.6647             | -0.0017 |
| 4 <sub>22</sub> - 3 <sub>22</sub>              | 3.2192 | 3.1990          | -0.0202 | 3.2171             | -0.0021 |
| 4 <sub>22</sub> - 4 <sub>04</sub>              | 2.5538 | 2.5366          | -0.0172 | 2.5524             | -0.0014 |
| 5 <sub>24</sub> - 4 <sub>04</sub>              | 4.0051 | 3.9892          | -0.0159 | 4.0041             | -0.0010 |
| 6 <sub>06</sub> - 4 <sub>04</sub>              | 4.5560 | 4.5369          | -0.0191 | 4.5517             | -0.0043 |
| 4 <sub>40</sub> - 4 <sub>22</sub>              | 0.7777 | 0.7919          | 0.0142  | 0.7776             | -0.0001 |
| 5 <sub>24</sub> - 4 <sub>22</sub>              | 1.4513 | 1.4526          | 0.0013  | 1.4517             | 0.0004  |
| 4 <sub>41</sub> - 4 <sub>23</sub>              | 1.7552 | 1.7697          | 0.0145  | 1.7580             | 0.0028  |
| 5 <sub>05</sub> - 4 <sub>23</sub>              | 0.6094 | 0.6065          | -0.0029 | 0.6067             | -0.0027 |
| 5 <sub>23</sub> - 4 <sub>23</sub>              | 3.9142 | 3.9002          | -0.0140 | 3.9094             | -0.0048 |
| 6 <sub>25</sub> - 4 <sub>23</sub>              | 5.3912 | 5.3698          | -0.0214 | 5.3868             | -0.0044 |
| 6 <sub>25</sub> - 5 <sub>23</sub>              | 1.4770 | 1.4696          | -0.0074 | 1.4775             | 0.0005  |
| average                                        |        |                 | -0.0072 |                    | -0.0011 |
| RMSD                                           |        |                 | 0.0123  |                    | 0.0022  |

<sup>a</sup>M. J. Weida, J. M. Sperhac, D. J. Nesbitt, and J. M. Hutson, *J. Chem. Phys.* **101**, 8351 (1994).

**Table A-2.** Comparison of pure rotation level spacings of CO<sub>2</sub>( $v_3 = 1$ )-He calculated from our vibrationally averaged 2D PES, with experimental values defined as differences between observed infrared transitions<sup>a</sup> with a common lower state.

| levels<br>$J'_{K'_a K'_c} - J''_{K''_a K''_c}$ | obs.   | original 2D PES |         | $R_e$ -morphed PES |          |
|------------------------------------------------|--------|-----------------|---------|--------------------|----------|
|                                                |        | calc.           | diff.   | calc.              | diff.    |
| 2 <sub>12</sub> - 1 <sub>10</sub>              | 0.7390 | 0.7375          | -0.0015 | 0.7396             | 0.0006.  |
| 2 <sub>11</sub> - 1 <sub>11</sub>              | 1.5896 | 1.5814          | -0.0082 | 1.5923             | 0.0027.  |
| 3 <sub>13</sub> - 2 <sub>11</sub>              | 0.7106 | 0.7112          | 0.0006  | 0.7094             | -0.0012. |
| 3 <sub>31</sub> - 2 <sub>11</sub>              | 2.4694 | 2.4734          | 0.0040  | 2.4691             | -0.0003. |
| 3 <sub>30</sub> - 2 <sub>12</sub>              | 3.2577 | 3.2515          | -0.0062 | 3.2604             | 0.0027.  |
| 3 <sub>12</sub> - 2 <sub>12</sub>              | 2.4511 | 2.4436          | -0.0075 | 2.4545             | 0.0034.  |
| 3 <sub>30</sub> - 3 <sub>12</sub>              | 0.8066 | 0.8079          | 0.0013  | 0.8059             | -0.0007. |
| 4 <sub>14</sub> - 3 <sub>12</sub>              | 0.6140 | 0.6131          | -0.0009 | 0.6127             | -0.0013. |
| 4 <sub>32</sub> - 3 <sub>12</sub>              | 3.0229 | 3.0167          | -0.0062 | 3.0216             | -0.0013. |
| 3 <sub>31</sub> - 3 <sub>13</sub>              | 1.7591 | 1.7623          | 0.0032  | 1.7597             | 0.0006.  |
| 4 <sub>13</sub> - 3 <sub>13</sub>              | 3.2205 | 3.2124          | -0.0081 | 3.2233             | 0.0028.  |
| 4 <sub>32</sub> - 3 <sub>30</sub>              | 2.2163 | 2.2088          | -0.0075 | 2.2156             | -0.0007. |
| 4 <sub>13</sub> - 3 <sub>31</sub>              | 1.4611 | 1.4502          | -0.0109 | 1.4636             | 0.0025.  |
| 4 <sub>31</sub> - 3 <sub>31</sub>              | 2.9320 | 2.9064          | -0.0256 | 2.9353             | 0.0033.  |
| 4 <sub>31</sub> - 4 <sub>13</sub>              | 1.4711 | 1.4562          | -0.0149 | 1.4717             | 0.0006.  |
| 5 <sub>15</sub> - 4 <sub>13</sub>              | 0.5825 | 0.5801          | -0.0024 | 0.5815             | -0.0010. |
| 5 <sub>33</sub> - 4 <sub>13</sub>              | 3.7349 | 3.7175          | -0.0174 | 3.7297             | -0.0052. |
| 4 <sub>32</sub> - 4 <sub>14</sub>              | 2.4087 | 2.4036          | -0.0051 | 2.4089             | 0.0002.  |
| 5 <sub>14</sub> - 4 <sub>14</sub>              | 3.9742 | 3.9633          | -0.0109 | 3.9765             | 0.0023.  |
| 5 <sub>33</sub> - 4 <sub>31</sub>              | 2.2643 | 2.2613          | -0.0030 | 2.2580             | -0.0063. |
| 5 <sub>14</sub> - 4 <sub>32</sub>              | 1.5650 | 1.5597          | -0.0053 | 1.5676             | 0.0026.  |
| 6 <sub>16</sub> - 5 <sub>14</sub>              | 0.5552 | 0.5526          | -0.0026 | 0.5536             | -0.0016. |
| average                                        |        |                 | -0.0061 |                    | 0.0002   |
| RMSD                                           |        |                 | 0.0092  |                    | 0.0025   |

<sup>a</sup>M. J. Weida, J. M. Sperhac, D. J. Nesbitt, and J. M. Hutson, J. Chem. Phys. **101**, 8351 (1994).

**Table A-3.** Comparison of calculated infrared transition frequencies for  $^{12}\text{C}^{16}\text{O}_2\text{-He}$  (in  $\text{cm}^{-1}$ ) with experiment.<sup>a</sup>

| $J'_{K'_a K'_c} - J''_{K''_a K''_c}$ | potential :<br>observed | original<br>{calc. - obs.} | morph $R_e$<br>{calc. - obs.} | morph $R_e$ & $\mathcal{D}_e$<br>{calc. - obs.} |
|--------------------------------------|-------------------------|----------------------------|-------------------------------|-------------------------------------------------|
| 6 <sub>16</sub> - 7 <sub>07</sub>    | 2346.3788               | -0.0177                    | -0.0269                       | 0.0158                                          |
| 5 <sub>15</sub> - 6 <sub>06</sub>    | 2346.7611               | -0.0302                    | -0.0385                       | 0.0048                                          |
| 4 <sub>14</sub> - 5 <sub>05</sub>    | 2347.1394               | -0.0342                    | -0.0411                       | 0.0026                                          |
| 3 <sub>13</sub> - 4 <sub>04</sub>    | 2347.5141               | -0.0388                    | -0.0446                       | -0.0007                                         |
| 2 <sub>12</sub> - 3 <sub>03</sub>    | 2347.8872               | -0.0422                    | -0.0472                       | -0.0030                                         |
| 1 <sub>11</sub> - 2 <sub>02</sub>    | 2348.2810               | -0.0436                    | -0.0490                       | -0.0045                                         |
| 1 <sub>10</sub> - 1 <sub>01</sub>    | 2349.4874               | -0.0475                    | -0.0482                       | -0.0038                                         |
| 2 <sub>11</sub> - 2 <sub>02</sub>    | 2349.8702               | -0.0514                    | -0.0459                       | -0.0018                                         |
| 3 <sub>12</sub> - 3 <sub>03</sub>    | 2350.3383               | -0.0497                    | -0.0031                       | 0.0002                                          |
| 4 <sub>13</sub> - 4 <sub>04</sub>    | 2350.7346               | -0.0469                    | -0.0418                       | 0.0019                                          |
| 5 <sub>14</sub> - 5 <sub>05</sub>    | 2351.1134               | -0.0449                    | -0.0386                       | 0.0046                                          |
| 1 <sub>11</sub> - 0 <sub>00</sub>    | 2349.8646               | -0.0490                    | -0.0485                       | -0.0040                                         |
| 2 <sub>12</sub> - 1 <sub>01</sub>    | 2350.2264               | -0.0491                    | -0.0476                       | -0.0034                                         |
| 3 <sub>13</sub> - 2 <sub>02</sub>    | 2350.5808               | -0.0509                    | -0.0471                       | -0.0032                                         |
| 4 <sub>14</sub> - 3 <sub>03</sub>    | 2350.9525               | -0.0508                    | -0.0454                       | -0.0017                                         |
| 5 <sub>15</sub> - 4 <sub>04</sub>    | 2351.3171               | -0.0493                    | -0.0428                       | 0.0005                                          |
| 6 <sub>16</sub> - 5 <sub>05</sub>    | 2351.6686               | -0.0474                    | -0.0402                       | 0.0025                                          |
| 5 <sub>14</sub> - 6 <sub>25</sub>    | 2346.3318               | -0.0266                    | -0.0372                       | 0.0060                                          |
| 4 <sub>13</sub> - 5 <sub>24</sub>    | 2346.7295               | -0.0310                    | -0.0409                       | 0.0029                                          |
| 3 <sub>12</sub> - 4 <sub>23</sub>    | 2347.1348               | -0.0362                    | -0.0018                       | 0.0015                                          |
| 2 <sub>11</sub> - 3 <sub>22</sub>    | 2347.4700               | -0.0435                    | -0.0452                       | -0.0011                                         |
| 1 <sub>11</sub> - 2 <sub>20</sub>    | 2347.4149               | -0.0419                    | -0.0495                       | -0.0050                                         |
| 1 <sub>10</sub> - 2 <sub>21</sub>    | 2347.8126               | -0.0482                    | -0.0494                       | -0.0050                                         |
| 2 <sub>11</sub> - 2 <sub>20</sub>    | 2349.0045               | -0.0501                    | -0.0468                       | -0.0027                                         |
| 2 <sub>12</sub> - 2 <sub>21</sub>    | 2348.5525               | -0.0506                    | -0.0497                       | -0.0055                                         |
| 3 <sub>12</sub> - 3 <sub>21</sub>    | 2348.7015               | -0.0355                    | -0.0019                       | 0.0014                                          |
| 3 <sub>13</sub> - 3 <sub>22</sub>    | 2348.1808               | -0.0431                    | -0.0466                       | -0.0027                                         |
| 4 <sub>13</sub> - 4 <sub>22</sub>    | 2348.1808               | -0.0297                    | -0.0404                       | 0.0033                                          |
| 4 <sub>14</sub> - 4 <sub>23</sub>    | 2347.7488               | -0.0371                    | -0.0439                       | -0.0002                                         |
| 5 <sub>14</sub> - 5 <sub>23</sub>    | 2347.8088               | -0.0340                    | -0.0367                       | 0.0064                                          |
| 3 <sub>12</sub> - 2 <sub>21</sub>    | 2351.0036               | -0.0581                    | -0.0056                       | -0.0023                                         |
| 4 <sub>13</sub> - 3 <sub>22</sub>    | 2351.4010               | -0.0509                    | -0.0435                       | 0.0002                                          |
| 5 <sub>14</sub> - 4 <sub>23</sub>    | 2351.7230               | -0.0480                    | -0.0415                       | 0.0016                                          |
| 3 <sub>31</sub> - 4 <sub>22</sub>    | 2346.7207               | -0.0197                    | -0.0440                       | 0.0005                                          |
| 3 <sub>30</sub> - 3 <sub>21</sub>    | 2349.5082               | -0.0343                    | -0.0434                       | 0.0006                                          |
| 3 <sub>31</sub> - 3 <sub>22</sub>    | 2349.9399               | -0.0399                    | -0.0461                       | -0.0016                                         |
| 4 <sub>31</sub> - 4 <sub>22</sub>    | 2349.6519               | -0.0446                    | -0.0399                       | 0.0026                                          |
| 4 <sub>32</sub> - 4 <sub>23</sub>    | 2350.1580               | -0.0427                    | -0.0442                       | -0.0011                                         |
| 5 <sub>33</sub> - 5 <sub>24</sub>    | 2350.4644               | -0.0484                    | -0.0461                       | -0.0045                                         |
| 3 <sub>31</sub> - 2 <sub>20</sub>    | 2351.4744               | -0.0466                    | -0.0476                       | -0.0032                                         |
| 3 <sub>30</sub> - 2 <sub>21</sub>    | 2351.8102               | -0.0569                    | -0.0471                       | -0.0030                                         |
| 4 <sub>32</sub> - 3 <sub>21</sub>    | 2351.7245               | -0.0418                    | -0.0441                       | -0.0010                                         |
| 5 <sub>33</sub> - 4 <sub>22</sub>    | 2351.9162               | -0.0476                    | -0.0461                       | -0.0046                                         |
| 3 <sub>31</sub> - 4 <sub>40</sub>    | 2345.9430               | -0.0340                    | -0.0439                       | 0.0006                                          |
| 3 <sub>30</sub> - 4 <sub>41</sub>    | 2346.1859               | -0.0491                    | -0.0457                       | -0.0017                                         |
| 4 <sub>31</sub> - 4 <sub>40</sub>    | 2348.8750               | -0.0596                    | -0.0406                       | 0.0019                                          |
| 4 <sub>32</sub> - 4 <sub>41</sub>    | 2348.4028               | -0.0572                    | -0.0470                       | -0.0039                                         |
| 3 <sub>31</sub> - 2 <sub>02</sub>    | 2352.3396               | -0.0474                    | -0.0463                       | -0.0018                                         |
| 4 <sub>32</sub> - 3 <sub>03</sub>    | 2353.3612               | -0.0559                    | -0.0452                       | -0.0021                                         |
| average                              | —                       | -0.0435                    | -0.0407                       | -0.0003                                         |
| RMSD                                 | —                       | 0.0445                     | 0.0424                        | 0.0038                                          |

<sup>a</sup> M. J. Weida, J. M. Sperhac, D. J. Nesbitt, and J. M. Hutson, *J. Chem. Phys.* **101**, 8351 (1994).

**Table A-4.** Comparison with experiment<sup>a</sup> of infrared transition frequencies for  $^{13}\text{C}^{16}\text{O}_2\text{-He}$  and  $^{12}\text{C}^{18}\text{O}_2\text{-He}$  (in  $\text{cm}^{-1}$ ) calculated using our final, fully morphed (w.r.t.  $R_e$  and  $\mathfrak{D}_e$ ) potential.

| $^{13}\text{C}^{16}\text{O}_2 - \text{He}$ |           |              | $^{13}\text{C}^{18}\text{O}_2 - \text{He}$ |           |              |
|--------------------------------------------|-----------|--------------|--------------------------------------------|-----------|--------------|
| $J'_{K'_a K'_c} - J''_{K''_a K''_c}$       | calc.     | calc. - Obs. | $J'_{K'_a K'_c} - J''_{K''_a K''_c}$       | calc.     | calc. - Obs. |
| $1_{11} - 0_{00}$                          | 2284.2024 | -0.0013      | $1_{01} - 0_{00}$                          | 2247.9476 | -0.0026      |
| $1_{10} - 1_{01}$                          | 2283.8257 | -0.0005      | $1_{10} - 1_{11}$                          | 2247.5925 | -0.0023      |
| $2_{12} - 1_{01}$                          | 2284.5647 | -0.0009      | $2_{12} - 1_{11}$                          | 2248.2904 | -0.0022      |
| $1_{11} - 2_{02}$                          | 2282.6197 | -0.0019      | $1_{01} - 2_{02}$                          | 2246.4618 | -0.0029      |
| $2_{11} - 2_{02}$                          | 2284.2090 | 0.0015       | $2_{21} - 2_{02}$                          | 2248.0461 | -0.0001      |
| $3_{13} - 2_{02}$                          | 2284.9190 | -0.0006      | $3_{03} - 2_{02}$                          | 2248.6516 | -0.0017      |
| $1_{10} - 2_{21}$                          | 2282.1498 | -0.0025      | $3_{21} - 2_{02}$                          | 2250.1654 | -0.0011      |
| $2_{12} - 2_{21}$                          | 2282.8888 | -0.0027      | $1_{10} - 2_{11}$                          | 2246.1119 | -0.0034      |
| $3_{12} - 2_{21}$                          | 2285.3408 | 0.0004       | $2_{12} - 2_{11}$                          | 2246.8097 | -0.0036      |
| $3_{30} - 2_{21}$                          | 2286.1475 | 0.0001       | $3_{12} - 2_{11}$                          | 2249.1020 | -0.0012      |
| $1_{11} - 2_{20}$                          | 2281.7537 | -0.0034      | $3_{30} - 2_{11}$                          | 2249.8802 | -0.0006      |
| $2_{11} - 2_{20}$                          | 2283.3430 | 0.0000       | $1_{01} - 2_{20}$                          | 2245.6472 | -0.0036      |
| $3_{31} - 2_{20}$                          | 2285.8145 | 0.0000       | $2_{21} - 2_{20}$                          | 2247.2315 | -0.0007      |
| $2_{12} - 3_{03}$                          | 2282.2274 | -0.0007      | $3_{21} - 2_{20}$                          | 2249.3508 | -0.0015      |
| $3_{12} - 3_{03}$                          | 2284.6795 | 0.0020       | $2_{12} - 3_{13}$                          | 2246.1182 | -0.0010      |
| $4_{14} - 3_{03}$                          | 2285.2921 | 0.0007       | $3_{12} - 3_{13}$                          | 2248.4105 | 0.0010       |
| $2_{11} - 3_{22}$                          | 2281.8112 | 0.0002       | $4_{14} - 3_{13}$                          | 2249.0028 | 0.0002       |
| $3_{13} - 3_{22}$                          | 2282.5212 | -0.0007      | $2_{21} - 3_{22}$                          | 2245.7894 | -0.0001      |
| $3_{31} - 3_{22}$                          | 2284.2827 | 0.0013       | $3_{03} - 3_{22}$                          | 2246.3949 | -0.0010      |
| $4_{13} - 3_{22}$                          | 2285.7423 | 0.0029       | $3_{21} - 3_{22}$                          | 2247.9087 | -0.0004      |
| $3_{12} - 3_{21}$                          | 2283.0471 | 0.0042       | $4_{23} - 3_{22}$                          | 2249.4020 | 0.0010       |
| $3_{30} - 3_{21}$                          | 2283.8538 | 0.0036       | $3_{12} - 3_{31}$                          | 2246.7335 | 0.0022       |
| $3_{13} - 4_{04}$                          | 2281.8570 | 0.0018       | $3_{30} - 3_{31}$                          | 2247.5117 | 0.0024       |
| $5_{15} - 4_{04}$                          | 2285.6589 | 0.0027       | $3_{03} - 4_{04}$                          | 2245.7668 | 0.0003       |
|                                            |           |              | $3_{21} - 4_{04}$                          | 2247.2807 | -0.0013      |
|                                            |           |              | $4_{23} - 4_{04}$                          | 2248.7740 | 0.0024       |
|                                            |           |              | $5_{05} - 4_{04}$                          | 2249.3415 | -0.0108      |
|                                            |           |              | $3_{12} - 4_{13}$                          | 2245.3845 | 0.0010       |
|                                            |           |              | $4_{14} - 4_{13}$                          | 2245.9768 | -0.0006      |
| average{calc. - obs, }                     | —         | 0.0003       | —                                          | —         | -0.0011      |
| RMSD{calc. - obs, }                        | —         | 0.0020       | —                                          | —         | 0.0027       |

<sup>a</sup>M. J. Weida, J. M. Sperhac, D. J. Nesbitt, and J. M. Hutson, *J. Chem. Phys.* **101**, 8351 (1994).

**Table A-5.** Expansion coefficients  $\overline{\mathfrak{D}}_e^\lambda$  [ $\text{cm}^{-1}$ ],  $\overline{R}_e^\lambda$  [ $\text{\AA}$ ] and  $\overline{\beta}_i^\lambda$  defining our unmorphed two-dimensional vibrationally averaged potential energy surfaces for  $^{13}\text{C}^{16}\text{O}_2(v_3)$ -He for  $v_3 = 0$  and 1. The morphing would be incorporated by multiplying all of the  $\overline{R}_e^\lambda$  values by the scaling factor  $f_{R_e} = 0.99577$ , and by multiplying the  $\overline{\mathfrak{D}}_e^\lambda$  factors for the  $v_3 = 1$  surface by the factor  $f_{\overline{\mathfrak{D}}_e}^{[v_3=1]} = 0.99842$ .

| parameters defining 2D-MLR PES for $^{13}\text{C}^{16}\text{O}_2(v_3=0)$ -He |          |                                     |          |                        |         |
|------------------------------------------------------------------------------|----------|-------------------------------------|----------|------------------------|---------|
| $\overline{\mathfrak{D}}_e^0$                                                | 32.040   | $\overline{R}_e^0$                  | 3.61898  | $\overline{\beta}_0^0$ | 0.0305  |
| $\overline{\mathfrak{D}}_e^2$                                                | -14.790  | $\overline{R}_e^2$                  | 0.83646  | $\overline{\beta}_0^2$ | 1.0010  |
| $\overline{\mathfrak{D}}_e^4$                                                | 14.617   | $\overline{R}_e^4$                  | -0.26196 | $\overline{\beta}_0^4$ | -0.0173 |
| $\overline{\mathfrak{D}}_e^6$                                                | -8.050   | $\overline{R}_e^6$                  | 0.09368  | $\overline{\beta}_1^0$ | 0.6962  |
| $\overline{\mathfrak{D}}_e^8$                                                | 4.315    | $\overline{R}_e^8$                  | -0.03118 | $\overline{\beta}_1^2$ | 0.180   |
| $\overline{\mathfrak{D}}_e^{10}$                                             | -2.135   | $\overline{R}_e^{10}$               | 0.00830  | $\overline{\beta}_2^0$ | -0.235  |
| $\overline{\mathfrak{D}}_e^{12}$                                             | 0.975    | $\overline{R}_e^{12}$               | -0.00143 | $\overline{\beta}_2^2$ | -0.203  |
| $\overline{\mathfrak{D}}_e^{14}$                                             | -0.438   |                                     |          | $\overline{\beta}_3^0$ | 0.15    |
| $\overline{\mathfrak{D}}_e^{16}$                                             | 0.184    |                                     |          |                        |         |
| $\overline{C}_6^0$                                                           | 72456.88 | $\overline{C}_8^0/\overline{C}_6^0$ | 4.65     |                        |         |
| $\overline{C}_6^2$                                                           | 19135.86 | $\overline{C}_8^2/\overline{C}_6^0$ | 4.85     |                        |         |
| parameters defining 2D-MLR PES for $^{13}\text{C}^{16}\text{O}_2(v_3=1)$ -He |          |                                     |          |                        |         |
| $\overline{\mathfrak{D}}_e^0$                                                | 31.982   | $\overline{R}_e^0$                  | 3.61997  | $\overline{\beta}_0^0$ | 0.0292  |
| $\overline{\mathfrak{D}}_e^2$                                                | -14.642  | $\overline{R}_e^2$                  | 0.83501  | $\overline{\beta}_0^2$ | 1.0006  |
| $\overline{\mathfrak{D}}_e^4$                                                | 14.561   | $\overline{R}_e^4$                  | -0.26244 | $\overline{\beta}_0^4$ | -0.0161 |
| $\overline{\mathfrak{D}}_e^6$                                                | -7.980   | $\overline{R}_e^6$                  | 0.09342  | $\overline{\beta}_1^0$ | 0.6914  |
| $\overline{\mathfrak{D}}_e^8$                                                | 4.283    | $\overline{R}_e^8$                  | -0.03117 | $\overline{\beta}_1^2$ | 0.178   |
| $\overline{\mathfrak{D}}_e^{10}$                                             | -2.106   | $\overline{R}_e^{10}$               | 0.0081   | $\overline{\beta}_2^0$ | -0.237  |
| $\overline{\mathfrak{D}}_e^{12}$                                             | 0.964    | $\overline{R}_e^{12}$               | -0.00126 | $\overline{\beta}_2^2$ | -0.204  |
| $\overline{\mathfrak{D}}_e^{14}$                                             | -0.456   |                                     |          | $\overline{\beta}_3^0$ | 0.15    |
| $\overline{\mathfrak{D}}_e^{16}$                                             | 0.193    |                                     |          |                        |         |
| $\overline{C}_6^0$                                                           | 72508.52 | $\overline{C}_8^0/\overline{C}_6^0$ | 4.65     |                        |         |
| $\overline{C}_6^2$                                                           | 19069.74 | $\overline{C}_8^2/\overline{C}_6^0$ | 4.85     |                        |         |

**Table A-6.** Expansion coefficients  $\overline{\mathfrak{D}}_e^\lambda$  [ $\text{cm}^{-1}$ ],  $\overline{R}_e^\lambda$  [ $\text{\AA}$ ] and  $\overline{\beta}_i^\lambda$  defining our unmorphed two-dimensional vibrationally averaged potential energy surfaces for  $^{12}\text{C}^{18}\text{O}_2(v_3=0)$ -He for  $v_3 = 0$  and 1. The morphing would be incorporated by multiplying all of the  $\overline{R}_e^\lambda$  values by the scaling factor  $f_{R_e} = 0.99577$ , and by multiplying the  $\overline{\mathfrak{D}}_e^\lambda$  factors for the  $v_3 = 1$  surface by the factor  $f_{\overline{\mathfrak{D}}_e}^{[v_3=1]} = 0.99842$ .

| parameters defining 2D-MLR PES for $^{12}\text{C}^{18}\text{O}_2(v_3=0)$ -He |          |                                     |          |                        |         |
|------------------------------------------------------------------------------|----------|-------------------------------------|----------|------------------------|---------|
| $\overline{\mathfrak{D}}_e^0$                                                | 32.040   | $\overline{R}_e^0$                  | 3.61898  | $\overline{\beta}_0^0$ | 0.0305  |
| $\overline{\mathfrak{D}}_e^2$                                                | -14.788  | $\overline{R}_e^2$                  | 0.83645  | $\overline{\beta}_0^2$ | 1.0010  |
| $\overline{\mathfrak{D}}_e^4$                                                | 14.616   | $\overline{R}_e^4$                  | -0.26196 | $\overline{\beta}_0^4$ | -0.0173 |
| $\overline{\mathfrak{D}}_e^6$                                                | -8.050   | $\overline{R}_e^6$                  | 0.09367  | $\overline{\beta}_1^0$ | 0.6962  |
| $\overline{\mathfrak{D}}_e^8$                                                | 4.315    | $\overline{R}_e^8$                  | -0.03119 | $\overline{\beta}_1^2$ | 0.180   |
| $\overline{\mathfrak{D}}_e^{10}$                                             | -2.135   | $\overline{R}_e^{10}$               | 0.00830  | $\overline{\beta}_2^0$ | -0.235  |
| $\overline{\mathfrak{D}}_e^{12}$                                             | 0.975    | $\overline{R}_e^{12}$               | -0.00142 | $\overline{\beta}_2^2$ | -0.203  |
| $\overline{\mathfrak{D}}_e^{14}$                                             | -0.438   |                                     |          | $\overline{\beta}_3^0$ | 0.15    |
| $\overline{\mathfrak{D}}_e^{16}$                                             | 0.184    |                                     |          |                        |         |
| $\overline{C}_6^0$                                                           | 72457.22 | $\overline{C}_8^0/\overline{C}_6^0$ | 4.65     |                        |         |
| $\overline{C}_6^2$                                                           | 19135.95 | $\overline{C}_8^2/\overline{C}_6^0$ | 4.85     |                        |         |
| parameters defining 2D-MLR PES for $^{12}\text{C}^{18}\text{O}_2(v_3=1)$ -He |          |                                     |          |                        |         |
| $\overline{\mathfrak{D}}_e^0$                                                | 31.981   | $\overline{R}_e^0$                  | 3.61998  | $\overline{\beta}_0^0$ | 0.0292  |
| $\overline{\mathfrak{D}}_e^2$                                                | -14.640  | $\overline{R}_e^2$                  | 0.83499  | $\overline{\beta}_0^2$ | 1.0003  |
| $\overline{\mathfrak{D}}_e^4$                                                | 14.560   | $\overline{R}_e^4$                  | -0.26245 | $\overline{\beta}_0^4$ | -0.0161 |
| $\overline{\mathfrak{D}}_e^6$                                                | -7.979   | $\overline{R}_e^6$                  | 0.09342  | $\overline{\beta}_0^6$ | 0.6911  |
| $\overline{\mathfrak{D}}_e^8$                                                | 4.282    | $\overline{R}_e^8$                  | -0.03117 | $\overline{\beta}_1^0$ | 0.177   |
| $\overline{\mathfrak{D}}_e^{10}$                                             | -2.105   | $\overline{R}_e^{10}$               | 0.00810  | $\overline{\beta}_2^0$ | -0.237  |
| $\overline{\mathfrak{D}}_e^{12}$                                             | 0.963    | $\overline{R}_e^{12}$               | -0.00126 | $\overline{\beta}_2^2$ | -0.204  |
| $\overline{\mathfrak{D}}_e^{14}$                                             | -0.456   |                                     |          | $\overline{\beta}_3^0$ | 0.15    |
| $\overline{\mathfrak{D}}_e^{16}$                                             | 0.193    |                                     |          |                        |         |
| $\overline{C}_6^0$                                                           | 72509.52 | $\overline{C}_8^0/\overline{C}_6^0$ | 4.65     |                        |         |
| $\overline{C}_6^2$                                                           | 19062.75 | $\overline{C}_8^2/\overline{C}_6^0$ | 4.85     |                        |         |

**Table A-7.** Expansion coefficients  $\overline{\mathfrak{D}}_e^\lambda$  [ $\text{cm}^{-1}$ ],  $\overline{R}_e^\lambda$  [ $\text{\AA}$ ] and  $\overline{\beta}_i^\lambda$  defining our unmorphed two-dimensional vibrationally averaged potential energy surfaces for  $^{13}\text{C}^{18}\text{O}_2(v_3=0)\text{-He}$  for  $v_3 = 0$  and 1. The morphing would be incorporated by multiplying all of the  $\overline{R}_e^\lambda$  values by the scaling factor  $f_{R_e} = 0.99577$ , and by multiplying the  $\overline{\mathfrak{D}}_e^\lambda$  factors for the  $v_3 = 1$  surface by the factor  $f_{\overline{\mathfrak{D}}_e}^{[v_3=1]} = 0.99842$ .

| parameters defining 2D-MLR PES for $^{13}\text{C}^{18}\text{O}_2(v_3=0)\text{-He}$ |          |                                     |          |                        |         |
|------------------------------------------------------------------------------------|----------|-------------------------------------|----------|------------------------|---------|
| $\overline{\mathfrak{D}}_e^0$                                                      | 32.041   | $\overline{R}_e^0$                  | 3.61897  | $\overline{\beta}_0^0$ | 0.0305  |
| $\overline{\mathfrak{D}}_e^2$                                                      | -14.79   | $\overline{R}_e^2$                  | 0.83647  | $\overline{\beta}_0^2$ | 1.001   |
| $\overline{\mathfrak{D}}_e^4$                                                      | 14.617   | $\overline{R}_e^4$                  | -0.26195 | $\overline{\beta}_0^4$ | -0.0173 |
| $\overline{\mathfrak{D}}_e^6$                                                      | -8.051   | $\overline{R}_e^6$                  | 0.09368  | $\overline{\beta}_1^0$ | 0.6962  |
| $\overline{\mathfrak{D}}_e^8$                                                      | 4.316    | $\overline{R}_e^8$                  | -0.03118 | $\overline{\beta}_1^2$ | 0.18    |
| $\overline{\mathfrak{D}}_e^{10}$                                                   | -2.136   | $\overline{R}_e^{10}$               | 0.0083   | $\overline{\beta}_2^0$ | -0.235  |
| $\overline{\mathfrak{D}}_e^{12}$                                                   | 0.975    | $\overline{R}_e^{12}$               | -0.00143 | $\overline{\beta}_2^2$ | -0.203  |
| $\overline{\mathfrak{D}}_e^{14}$                                                   | -0.438   |                                     |          | $\overline{\beta}_3^0$ | 0.15    |
| $\overline{\mathfrak{D}}_e^{16}$                                                   | 0.184    |                                     |          |                        |         |
| $\overline{C}_6^0$                                                                 | 72456.47 | $\overline{C}_8^0/\overline{C}_6^0$ | 4.65     |                        |         |
| $\overline{C}_6^2$                                                                 | 19135.75 | $\overline{C}_8^2/\overline{C}_6^0$ | 4.85     |                        |         |
| parameters defining 2D-MLR PES for $^{13}\text{C}^{18}\text{O}_2(v_3=0)\text{-He}$ |          |                                     |          |                        |         |
| $\overline{\mathfrak{D}}_e^0$                                                      | 31.983   | $\overline{R}_e^0$                  | 3.61994  | $\overline{\beta}_0^0$ | 0.0293  |
| $\overline{\mathfrak{D}}_e^2$                                                      | -14.646  | $\overline{R}_e^2$                  | 0.83504  | $\overline{\beta}_0^2$ | 1.0006  |
| $\overline{\mathfrak{D}}_e^4$                                                      | 14.562   | $\overline{R}_e^4$                  | -0.26242 | $\overline{\beta}_0^4$ | -0.0162 |
| $\overline{\mathfrak{D}}_e^6$                                                      | -7.982   | $\overline{R}_e^6$                  | 0.09343  | $\overline{\beta}_0^6$ | 0.6915  |
| $\overline{\mathfrak{D}}_e^8$                                                      | 4.284    | $\overline{R}_e^8$                  | -0.03117 | $\overline{\beta}_1^0$ | 0.178   |
| $\overline{\mathfrak{D}}_e^{10}$                                                   | -2.106   | $\overline{R}_e^{10}$               | 0.00811  | $\overline{\beta}_2^0$ | -0.237  |
| $\overline{\mathfrak{D}}_e^{12}$                                                   | 0.964    | $\overline{R}_e^{12}$               | -0.00127 | $\overline{\beta}_2^2$ | -0.204  |
| $\overline{\mathfrak{D}}_e^{14}$                                                   | -0.456   |                                     |          | $\overline{\beta}_3^0$ | 0.15    |
| $\overline{\mathfrak{D}}_e^{16}$                                                   | 0.193    |                                     |          |                        |         |
| $\overline{C}_6^0$                                                                 | 72507.32 | $\overline{C}_8^0/\overline{C}_6^0$ | 4.65     |                        |         |
| $\overline{C}_6^2$                                                                 | 19069.42 | $\overline{C}_8^2/\overline{C}_6^0$ | 4.85     |                        |         |
